# Supplementary material
Source: HighWire-hosted journal article supplement (https://ez-admanager.com/highwire/filestream/156264/field_highwire_adjunct_files/0/benarroch_314.pdf)
Supplement: benarroch_314.pdf [file benarroch_314.pdf]

# Canales asociados a receptores de sulfonilurea

## Rol en la enfermedad e implicancias terapéuticas

Eduardo E. Benarroch,  
MD

Correspondencia a Dr. Benarroch:  
benarroch.eduardo@mayo.edu

Los receptores de sulfonilurea 1 (RSU) (RSU1) y 2 (RSU2) son miembros de la superfamilia de transportadores con unión a trifosfato de adenosina (ATP). A diferencia de otros miembros de esta superfamilia, estos receptores no participan en el transporte sino más bien en la formación de las subunidades formadoras de poros que conforman los canales catiónicos. Tanto RSU1 como RSU2 se asocian con subunidades de rectificación interna de canales de potasio ( $K^+$ ) (Kir) (Kir6) para formar canales de  $K^+$  ( $K_{ATP}$ ) funcionales sensibles a ATP.<sup>1</sup> Estos canales son sensores moleculares que proporcionan un enlace entre el estado de energía celular y la excitabilidad eléctrica; son tóxicamente inhibidos por ATP, y su activación en el contexto de la falta de energía resulta en hiperpolarización celular y vasodilatación, dando lugar a efectos celulares protectores. RSU1 también se asocia con la subunidad formadora de poros de calcio ( $Ca^{2+}$ ) del receptor del potencial transitorio de melastatina 4 (TRPM4).<sup>2</sup> En contraste con los canales  $K_{ATP}$ , los canales TRPM4 regulados por RSU1 son canales catiónicos monovalentes no selectivos que desencadenan la despolarización y vasoconstricción cerebral. La sobreexpresión de los canales RSU1-TRPM4 en condiciones tales como la isquemia cerebral puede resultar en muerte celular necrótica, afectando la unidad neurovascular y promoviendo el edema. Mientras que en condiciones normales los canales  $K_{ATP}$  ejercen efectos neuroprotectores, en condiciones patológicas su activación excesiva también puede ser perjudicial. La presencia de subunidades reguladoras de RSU hace que los canales  $K_{ATP}$  y TRPM4 se vuelvan sensibles a la inhibición por sulfonilureas tales como glibenclamida (gliburida). Evidencia preclínica en modelos experimentales y ensayos clínicos iniciales indican que este fármaco puede ser terapéutico en condiciones como las descritas en este caso representativo.<sup>3,4</sup>

**CASO REPRESENTATIVO.** Un hombre de 50 años con historia de hiperlipidemia e hipertensión se levanta con hemiparesia derecha e incapacidad para hablar. Al examen, se encontraba somnoliento y presentaba desviación forzada de la mirada a la izquierda, hemiplejía derecha y afasia. Una tomografía computarizada mostró una gran área hipodensa en el territorio de la arteria cerebral media izquierda. Una RM combinada de difusión y perfusión no demostró “mismatch” entre el área de difusión y perfusión. El volumen calculado de la zona de difusión restringida fue de 150 mm<sup>3</sup>. A pesar del control óptimo de la presión sanguínea, glucemia y la temperatura corporal fue progresivamente evolucionando a la falta de respuesta durante las próximas 24 horas. El examen repetido mostró una pupila izquierda dilatada no reactiva y signo de Babinski de forma bilateral. Se repitió una tomografía computarizada de cabeza que mostró severo edema en hemisferio izquierdo con desplazamiento de la línea media. El paciente recibió manitol EV y eventualmente se realizó una craniectomía descompresiva con mejoría de su nivel de conciencia, pero sin cambios en sus déficits neurológicos.

**Comentario.** Este caso representa el desarrollo de edema cerebral maligno que conduce a un deterioro neurológico abrupto dentro de las 24-48 horas siguientes a un accidente cerebrovascular de la arteria cerebral media. La fisiopatología del edema cerebral después del accidente cerebrovascular es compleja e implica la alteración de varios componentes de la unidad neurovascular, incluyendo neuronas, astrocitos y células endoteliales. Preponderante entre los numerosos mecanismos interactuantes, se incluye la ruptura de la barrera hematoencefálica que resulta en la extravasación de líquidos y transformación hemorrágica, la neuroinflamación con interrupción adicional de la matriz extracelular, excitotoxicidad neuronal y daño glial.<sup>5-8</sup> Muchos de estos

### GLOSARIO

**ABC** = Casete de unión al adenosín trifosfato; **ADP** = adenosín difosfato; **ATP** = adenosín trifosfato; **DEND** = Retraso del desarrollo, incoordinación motora y síndrome epiléptico;  **$K_{ATP}$**  = Canal de potasio sensible al ATP; **Kir** = Canal de rectificación interna de potasio; **NKCC 1** = cotransportador 1 de sodio-potasio-cloruro; **RSU** = receptor de sulfonilurea; **TRPM4** = receptor del potencial transitorio de melastatina 4.

Del Departamento de Neurología, Mayo Clinic, Rochester, MN.

Visite [Neurology.org](http://Neurology.org) para obtener información completa. La información de la financiación y las declaraciones relevantes por el autor, si las hay, se proporcionan al final del artículo.

cambios implican mecanismos desencadenados por la desregulación de los canales catiónicos, dando como resultado la despolarización celular y la inflamación osmótica, y la acumulación de  $\text{Ca}^{2+}$  intracelular desencadenando cascadas de eventos que afectan a varias proteínas diana. Hay una regulación positiva de la expresión de RSU1 y TRPM4 en el contexto de la isquemia aguda y otras lesiones y abundante evidencia experimental de que la señalización SUR1-TRPM4 puede contribuir a muchos de los mecanismos fisiopatológicos conducentes al edema en el contexto del ACV.<sup>3</sup> Mientras que los canales  $\text{K}_{\text{ATP}}$  podrían tener un efecto neuroprotector inicial, su actividad excesiva podría también tener consecuencias deletéreas en este contexto.

### LOS RECEPTORES DE SULFONILUREA COMO REGULADORES DE LAS SUBUNIDADES DE LOS CANALES CATIÓNICOS

**Estructura y regulación de los receptores de sulfonilurea.** Los receptores de sulfonilurea son miembros de la **superfamilia** de los cassettes transportadores (ABC) de unión al ATP e incluyen RSU1 (Codificado por el gen *ABCC8*) y RSU2 (codificado por el gen *ABCC9*); isoformas de *splicing* alternativo SUR2A y SUR2B.<sup>9</sup> Al igual que otros miembros de la superfamilia ABC, SUR1 y SUR2 consisten en una estructura central de 2 grandes 6-dominios transmembrana, asociados cada uno con un plegamiento de enlace de nucleótidos. Estos dominios se dimerizan para generar 2 sitios de enlaces de ATP, que permite la activación de múltiples procesos en la célula<sup>10</sup> (figura). A diferencia de la mayoría de las proteínas ABC, que median el transporte de sustratos contra un gradiente transmembrana, RSU1 y RSU2 forman complejos funcionales de subunidades de canales de cationes formadores de poros. Estos incluyen las subunidades Kir6.1 o Kir6.2 de canales de  $\text{K}^+$  sensible a ATP ( $\text{K}_{\text{ATP}}$ )<sup>1</sup> y la subunidad formadora de poros de  $\text{Ca}^{2+}$  y el canal catiónico monovalente no selectivo regulado por ATP, TRPM4.<sup>2</sup>

La regulación de la expresión de RSU ha sido principalmente caracterizada para RSU1. Estudios en células  $\beta$  pancreáticas muestran que varios factores de transcripción regulan la expresión de *ABCC8* que codifica la expresión RSU1, Sp1 (proteína de especificidad/factor Kruppel-like 1), que es importante para la expresión basal,<sup>11,12</sup> mientras que otros factores, tales como el factor-1 inducible por hipoxia y el factor nuclear kappa B, regulan la sobreexpresión de SUR1 en condiciones patológicas.<sup>13</sup>

**Canales de  $\text{K}^+$  sensibles a ATP.** Los canales  $\text{K}_{\text{ATP}}$  son heteromultímeros compuestos por el ensamble de subunidades reguladoras de los RSU (ya sea RSU1 o RSU2) y las subunidades formadoras de poros Kir6, incluyendo Kir6.1 (codificado

por el gen *KCNJ8*) o Kir6.2 (codificado por el gen *KCNJ11*)<sup>14</sup> (figura). Estos canales funcionan como sensores moleculares que responden a los niveles de nucleótidos citoplasmáticos, proporcionando así un vínculo único entre la energía celular y la excitabilidad eléctrica.<sup>1</sup> Estos canales son tónicamente cerrados por ATP, que interactúa directamente con la interfase entre las subunidades Kir6; en el contexto de falta de energía, el aumento de los niveles intracelulares de adenosindifosfato (ADP) conducen a la activación del canal por interacción de la adenosina de magnesio difosfato con el RSU.<sup>1</sup> La actividad ATPasa intrínseca de RSU otorga a esta subunidad reguladora la capacidad de detectar señales energéticas de estrés celular resultando en la apertura del canal  $\text{K}_{\text{ATP}}$  y la hiperpolarización celular.<sup>1</sup> Los canales nativos Kir6 contienen una señal de retención del retículo endoplasmático que impide su tráfico a la membrana plasmática a menos que estén asociados con la subunidad RSU. Los canales  $\text{K}_{\text{ATP}}$  se expresan ampliamente en muchos tejidos y tipos de células; están altamente expresados en el sistema nervioso, las células  $\beta$  pancreáticas, el músculo cardíaco y el músculo esquelético. Los canales  $\text{K}_{\text{ATP}}$  neuronales, como los de las células  $\beta$  pancreáticas, consisten principalmente de subunidades RSU1-Kir6.2; los canales RSU2A-Kir6.1 son expresados en el corazón y canales RSU2B-Kir6.2 en el músculo liso vascular.<sup>14</sup> Los canales  $\text{K}_{\text{ATP}}$  no son solo expresados en la membrana plasmática, sino también en la membrana de organelas intracelulares tales como mitocondrias, lo que destaca su papel en la detección de la homeostasis energética.<sup>15</sup>

Los canales neuronales  $\text{K}_{\text{ATP}}$  funcionan como sensores metabólicos que regulan la excitabilidad celular y la transmisión sináptica.<sup>16,17</sup> Por ejemplo, en el hipocampo, una disminución de la glucosa extracelular desencadena la liberación de ATP de las neuronas CA3; el ATP entonces funciona como una señal autocrina por medio de su desfosforilación a adenosina, que activa los receptores neuronales de la adenosina A1; estos receptores pueden desencadenar hiperpolarización neuronal mediante la activación de los canales  $\text{K}_{\text{ATP}}$ .<sup>18</sup> Además, los canales  $\text{K}_{\text{ATP}}$  que contienen subunidad SUR1/Kir6.1 están presentes en las terminales glutamatérgicas presinápticas del hipocampo e inhiben el glutamato desencadenado por la liberación de  $\text{Ca}^{++}$ .<sup>17,19</sup>

Además de su papel en el sistema nervioso, los canales  $\text{K}_{\text{ATP}}$  tienen muchas funciones en los tejidos periféricos. Los canales RSU1-Kir6.2  $\text{K}_{\text{ATP}}$  en las células pancreáticas  $\beta$  tienen un papel crítico en controlar la liberación de insulina en respuesta a los niveles de glucosa<sup>20</sup>; la expresión de los canales de  $\text{K}_{\text{ATP}}$  en las neuronas sensibles a glucosa en neuronas del núcleo ventromedial del hipotálamo es un componente crítico en el mantenimiento de

**Figura** Los canales asociados al receptor de sulfonilurea (RSU)

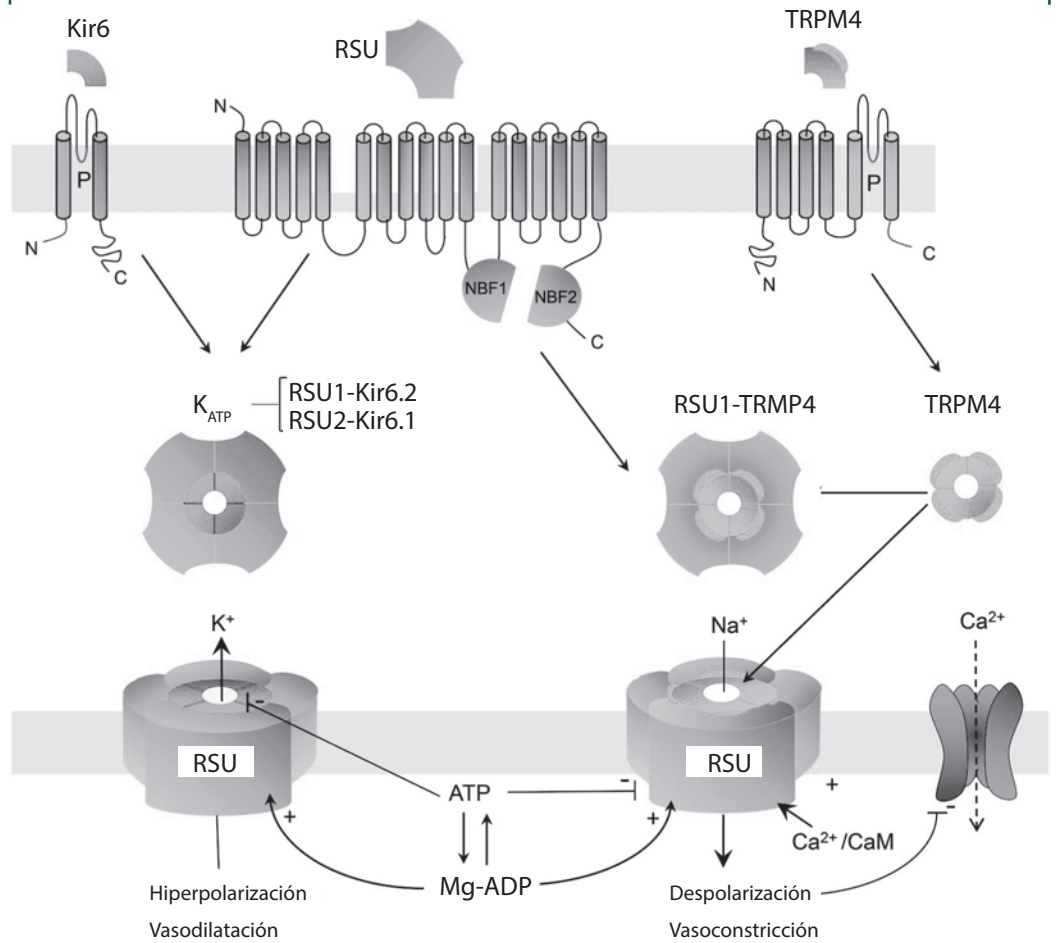

Los RSU consisten en una estructura central de 2 unidades de 6 dominios transmembrana, cada una asociada a un pliegue de unión de nucleótidos (NBF). Los RSU forman complejos funcionales con subunidades formadoras de poros de canales catiónicos. Estos incluyen las subunidades de canales de K<sup>+</sup> de rectificación interna Kir6.1 o Kir6.2 que son componentes de los canales de K<sup>+</sup> sensibles a ATP (K<sub>ATP</sub>) y la subunidad formadora de poros de calcio (Ca<sup>2+</sup>) y canal catiónico monovalente del receptor del potencial transitorio de melatonina 4 (TRPM4) regulado por ATP. Los canales K<sub>ATP</sub> son heteromultímeros compuestos del coensamble de subunidades reguladoras de RSU (RSU1 o RSU2) y las subunidades formadoras de poros Kir6. Estos canales están tónicamente cerrados por ATP; el aumento de los niveles intracelulares de difosfato de adenosina (ADP) conduce a la activación del canal a través de la interacción de magnesio-adenosina difosfato con el RSU. El canal TRPM4 es un canal de cationes monovalentes (Na<sup>+</sup>, K<sup>+</sup>) no selectivo que es activado por Ca<sup>2+</sup> intracelular e inhibido por ATP intracelular; los canales TRMP4 funcionales son tetrámeros, con cada monómero que contiene 6 hélices de dominio transmembrana y una región del poro entre los dominios transmembrana 5 y 6, asemejándose así a la estructura de los canales de K<sup>+</sup> dependientes de voltaje. La heterodimerización de canales TRMP4 con RSU1 facilita el tráfico de RSU1 a la membrana, hace que los canales sean susceptibles a la inhibición por sulfonilureas, aumenta la afinidad de los canales de TRPM4 por la calmodulina y aumenta su activación en respuesta a la disminución en el ATP intracelular. En respuesta a una disminución en el ATP intracelular, los canales K<sub>ATP</sub> permiten la salida de K<sup>+</sup> gatillando hiperpolarización celular y vasodilatación; en contraste, los canales TRPM4 median la entrada de Na<sup>+</sup> y desencadenan despolarización y vasoconstricción. Ambos canales K<sub>ATP</sub> y TRPM4 controlan la secreción de insulina y la función cardíaca (no se muestra). Modificado a partir de las referencias 3 (Simard JM y colaboradores, *Neurocrit Care* 2014;20:319-333) y 39 (Sala-Rabanal M, et al., *J. Biol Chem* 2012; 287: 8746-8756), con permiso.

la homeostasis de la glucosa plasmática mediante liberación de glucagón en respuesta a la hipoglucemia.<sup>21</sup> Los canales miocárdicos (SUR2A-Kir6.2) K<sub>ATP</sub> son sensores metabólicos que tienen un efecto cardioprotector contra los efectos de la isquemia mediando el acortamiento del potencial de acción cardíaco y el control de la entrada de Ca<sup>2+</sup> en el citosol; la activación de los canales sarcolemales de K<sub>ATP</sub> es el responsable de la corriente que subyace a la elevación del segmento ST en la lesión isquémica transmural.<sup>22,23</sup> Tanto en los vasos sanguíneos periféricos como cerebrales, los canales K<sub>ATP</sub> desencadenan hiperpolarización y vasodilatación.<sup>23,24</sup>

**El canal TRPM4.** El canal TRPM4 es un canal catiónico monovalente no selectivo (Na<sup>+</sup>, K<sup>+</sup>) que es activado por Ca<sup>2+</sup> intracelular, inhibido por ATP intracelular, y regulado por fosoinositoles.<sup>25,26</sup> Los canales TRMP4 funcionales son tetrámeros, con cada monómero que contiene 6 hélices de dominio transmembrana y una región de poro entre los dominios transmembrana 5 y 6, remedando la estructura de los canales de K<sup>+</sup> voltaje dependientes (figura). Los canales TRMP4 se transportan fácilmente a la membrana celular, en parte por las interacciones con las proteínas 14-3-3 y están afectados por la unión a pequeños modificadores proteicos similares a

la ubiquitina, la glicosilación y la fosforilación.<sup>27</sup> Los canales TRPM4 traducen la variación de los niveles intracelulares de  $\text{Ca}^{2+}$  en una corriente despolarizante  $\text{Na}^+/\text{K}^+$  y, por lo tanto, controlan la fuerza motriz para la entrada de  $\text{Ca}^{2+}$  y otros iones en la célula. Tanto por su acción despolarizadora como su capacidad de modular las ondas de  $\text{Ca}^{2+}$  intracelular es que los canales TRPM4 ejercen amplios efectos tanto en tejidos neuronales como no neuronales<sup>28</sup>. Están ampliamente expresados en el cerebro, el corazón, las arterias, el páncreas y otros tejidos periféricos. En el cerebro, los canales TRPM4 son abundantes en la corteza prefrontal, las células de Purkinje, en la pars compacta de la sustancia negra, en neuronas magnocelulares hipotalámicas secretantes de oxitocina y vasopresina, y en el complejo pre-Bötzingren del bulbo. La despolarización post-sináptica mediada por los canales TRPM4 puede ser importante para la potenciación a largo plazo dependiente de NMDA en el hipocampo<sup>29</sup> y promueve la ritmogénesis respiratoria en el complejo pre-Bötzingen.<sup>30</sup>

Los canales TRPM4 también están involucrados en la mecanotransducción y median la vasoconstricción inducida por la presión arterial en las arterias cerebrales, lo cual es importante para la autorregulación del flujo sanguíneo cerebral.<sup>31,32</sup> Además, los canales TRPM4 se expresan en las células del nodo sinoatrial y los cardiomiocitos auriculares, donde controlan varios aspectos de la ritmicidad cardíaca, la actividad de marcapaso, la conducción cardíaca y la repolarización del potencial de acción.<sup>33-35</sup> Al igual que  $\text{K}_{\text{ATP}}$  los canales TRPM4 modulan la secreción de insulina, en este caso mejorando la despolarización de la membrana inducida por la glucosa y el aumento intracelular de  $\text{Ca}^{2+}$  en células  $\beta$  pancreáticas.<sup>36</sup> Una función importante de los canales TRPM4 es la modulación de la inflamación y las respuestas inmunes, muchas de las cuales implican señalización provocadas por aumentos de  $\text{Ca}^{2+}$  intracelular. Por ejemplo, estos canales median la liberación de óxido nítrico en respuesta a la activación de receptores tipo peaje (*Toll like receptors*) de la microglía.<sup>37</sup> Sin embargo, la despolarización gatillada por canales TRPM4 puede reducir la amplitud de las ondas de  $\text{Ca}^{2+}$  intracelular mediadas por receptores de células T, reduciendo la liberación de citoquinas.<sup>38</sup>

La heterodimerización de canales TRPM4 con RSU1 facilita el tráfico de RSU1 a la membrana haciendo que los canales sean susceptibles a la inhibición por las sulfonilureas; aumentando la afinidad de los canales TRPM4 para la calmodulina y, por lo tanto, su sensibilidad al  $\text{Ca}^{2+}$  intracelular así como aumentando su activación en respuesta a la disminución del ATP intracelular.<sup>2</sup> Mientras que la sensibilidad a la calmodulina promovería la retroalimentación de la despolarización indu-

cida por TRPM4 en la prevención de la acumulación excesiva de  $\text{Ca}^{2+}$  intracelular, el aumento de las respuestas al MgADP intracelular promovería el flujo excesivo de iones monovalentes en un contexto de fracaso energético.<sup>2,3</sup> A pesar de la evidencia experimental de la relevancia de la interacción de los canales RSU1-TRPM4, algunos estudios electrofisiológicos *in vitro* muestran que, a diferencia del caso de los canales  $\text{K}_{\text{ATP}}$ , las corrientes mediadas por TRPM4 no siempre son afectadas por la presencia de RSU1.<sup>39</sup>

**CORRELACIONES CLÍNICAS Canalopatías de  $\text{K}^+$  RSU - Kir6 (sensibles a ATP).** Mutaciones por ganancia de función del gen *KCNJ11* que codifica la formación de las subunidades poros Kir6.2 reducen la afinidad de los canales  $\text{K}_{\text{ATP}}$  al ATP y, por tanto, su sensibilidad a la inhibición por ATP.<sup>40</sup> Estas mutaciones resultan en hiperpolarización de células  $\beta$  pancreáticas, reduciendo la secreción de insulina y produciendo diabetes neonatal. En casos severos, esto puede estar asociado con síntomas neurológicos tales como retraso del desarrollo, incoordinación motora y epilepsia (síndrome de DEND).<sup>40</sup> Estudios electrofisiológicos demuestran que los canales mutados con la mayor reducción en la inhibición mediada por ATP estaban asociados con los síntomas neurológicos más graves. Se desconocen los mecanismos por los cuales estas mutaciones desarrollan epilepsia, aunque algunas mutaciones pueden reducir la expresión de Kir6.2 *in vivo*.<sup>41</sup> Estas mutaciones también pueden resultar en una disminución de la perfusión del cerebelo<sup>42</sup> o en la secreción inapropiada de vasopresina.<sup>43</sup> Las sulfonilureas se han utilizado con éxito para tratar la diabetes en pacientes con mutaciones que activan Kir6.2 y pueden mejorar la disfunción motora en adultos con formas menos severas de DEND.<sup>44</sup> Las mutaciones por ganancia de función en *ABCC8* que afectan a RSU1 generan diabetes mellitus neonatal.<sup>45</sup> En contraste, mutaciones por pérdida de función de los genes *KCNJ11* (Kir6.2) o *ABCC8* causan hipoglucemia hiperinsulinémica de la infancia.<sup>20</sup>

Las mutaciones del gen *ABCC9* que codifica RSU2<sup>46,47</sup> o el gen *KCNJ8* que codifica Kir6.1<sup>48,49</sup> conducen a la hiperactividad de canales  $\text{K}_{\text{ATP}}$ <sup>50,51</sup> y producen el síndrome de Cantú. Este trastorno se caracteriza por hipertricosis congénita, dimorfismo facial, osteocondrodisplasia y anomalías cardiovasculares, que incluyen conducto arterioso permeable, cardiomegalia, derrame pericárdico y linfedema.<sup>46-49</sup> Una revisión reciente de 10 pacientes pediátricos mostró que el síndrome de Cantú está asociado con varios trastornos neurológicos y manifestaciones neuroimagenológicas, e incluyen migrañas, retraso en el desarrollo, convulsiones ocasionales y vasos sanguíneos cerebrales tortuosos.<sup>52</sup>

Las mutaciones en *ABCC9* con pérdida de función afectan la subunidad *RSU2A* de los canales cardíacos  $K_{ATP}$  y producen fibrilación auricular adrenérgica o miocardiopatía dilatada con taquicardia ventricular. Mutaciones del gen *TRPM4* se han relacionado con trastornos de la conducción cardíaca.<sup>33</sup>

**Papel dual de los canales  $K_{ATP}$  en el contexto de una lesión aguda del sistema nervioso.** Estudios en modelos experimentales sugieren que los canales  $K_{ATP}$  tienen funciones neuroprotectoras, por ejemplo, en la isquemia cerebral. En respuesta a un metabolismo energético y producción de ATP reducido, la hiperpolarización a través de los canales  $K_{ATP}$  puede prevenir la actividad neuronal excesiva, reducir el exceso de  $Ca^{2+}$  a través de canales controlados por voltaje y gatillar vasodilatación.<sup>53</sup> La expresión de Kir6.1 está disminuida en el área cerebral isquémica de los ratones 1 hora después de la oclusión de la arteria cerebral medial y reperfusión a las 24 horas; ratones heterocigotos *knockout* exhiben una disfunción neurológica exacerbada y aumento del tamaño del infarto, asociado con la sobreactivación glial y el daño de barrera hematoencefálica por agravamiento del estrés del retículo endoplásmico y niveles crecientes de citoquinas proinflamatorias.<sup>54,55</sup> Tratamientos que abren canales  $K_{ATP}$  durante el período de recuperación después de un accidente cerebrovascular isquémico también pueden tener efectos beneficiosos.<sup>56</sup> Nicorandil, un fármaco que abre el canal  $K_{ATP}$  de forma selectiva, reduce la hipoperfusión cerebral crónica inducida por la isquemia asociada con la reducción del flujo sanguíneo y el deterioro cognitivo en un modelo murino de demencia vascular.<sup>57</sup> El abridor de canales  $K_{ATP}$  iptakalim también disminuyó el daño neuronal por isquemia en los modelos de accidente cerebrovascular mediante la inhibición tanto de la activación astrocítica y microglial así como la secreción de productos inflamatorios, como la metaloproteínasa-9 de matriz y el factor de necrosis tumoral- $\alpha$ .<sup>58</sup> Los canales neuronales  $K_{ATP}$  también pueden reducir los riesgos de convulsiones en el contexto de déficit energético.<sup>59</sup> La apertura de los canales  $K_{ATP}$  que dependen de la actividad ayuda a las células granulares del dentado a actuar como una compuerta comicial en el hipocampo;<sup>60</sup> la inhibición genética tanto de *RSU1* o la subunidad Kir6.1 mejora la liberación de glutamato e induce convulsiones en ratones adultos.<sup>17</sup> Estudios en modelos de crisis epilépticas experimentales indican que la activación de los canales  $K_{ATP}$  pueden contribuir en los efectos antiepilépticos de la dieta cetogénica,<sup>60</sup> zolpidem,<sup>61</sup> diuréticos<sup>62</sup> y la pregabalina.<sup>62</sup>

Por otra parte, la activación excesiva de los canales  $K_{ATP}$  también puede tener efectos deletéreos en el contexto de un déficit energético severo. La

apertura de los canales  $K_{ATP}$  promueve la salida de  $K^+$  que tiene que ser compensado por la ATPasa de  $Na^+$ ,  $K^+$ , lo que conduce al aumento del consumo de ATP;<sup>63</sup> la hiperpolarización gatillada por  $K_{ATP}$  puede también aumentar la fuerza electroquímica de entrada de  $Ca^{2+}$  a través de canales no dependientes de voltaje. La dilatación crónica de los vasos cerebrales secundario a la hiperactividad de  $K_{ATP}$  puede reducir la reserva cerebrovascular y la vasoconstricción autorregulatoria en el contexto de hipotensión, como se observa en pacientes con el síndrome de Cantú.<sup>52</sup> La apertura excesiva de los  $K_{ATP}$  también puede relacionarse al desarrollo del fenómeno de depresión cortical y la migraña en estos pacientes.<sup>24</sup> La activación de canales  $K_{ATP}$  de la microglía también pueden contribuir a la neuroinflamación en el contexto del accidente cerebrovascular.<sup>64</sup>

### **Rol patológico de los canales *RSU1-TRPM4* en el contexto de lesión aguda del sistema nervioso.**

Existe abundante evidencia experimental que indica que hay una sobreexpresión de los canales *RSU1-TRPM4* en el contexto de un accidente cerebrovascular isquémico y otras enfermedades neurológicas agudas.<sup>3</sup> El factor inducible por hipoxia  $1\alpha$  sobreexpresa la expresión de *RSU1* en el contexto de la hipoxia cerebral o isquemia y el factor nuclear kappa B gatilla la sobreexpresión de *RSU1* en el contexto de la neuroinflamación y el trauma.<sup>13</sup> En consistencia con estos resultados experimentales se observa sobreexpresión de la expresión de *RSU1* en neuronas, astrocitos y células endoteliales vasculares en el material de autopsia de pacientes con accidente cerebrovascular<sup>65</sup> o lesión cerebral traumática.<sup>66</sup> El aumento de la actividad del canal *RSU1-TRPM4* conduce a un flujo excesivo de iones monovalentes en las células endoteliales, derivando en la muerte celular oncótica y fragmentación capilar.<sup>3</sup> Estos canales tienen, por ende, un papel esencial en el fracaso microvascular que resulta en el desarrollo de edema cerebral, neuroinflamación y hemorragia en el contexto de un accidente cerebrovascular, lesiones traumáticas u otros trastornos agudos.<sup>3</sup> Estudios preclínicos en modelos experimentales muestran que la glibenclamida (gliburida), mediante la inhibición de canales *RSU1-TRPM4* a nivel endotelial, neuronal, astrocítico y oligodendroglial, tienen efectos neuroprotectores en modelos experimentales de hipoxia cerebral, accidente cerebrovascular isquémico, hemorragia subaracnoidea, trauma, lesión de la médula espinal, paro cardíaco y encefalomiелitis alérgica experimental.<sup>3,67,68</sup> La glibenclamida también aumentó los efectos de la hipotermia retardada después de un accidente cerebrovascular o paro cardíaco en ratas.<sup>69,70</sup> La inhibición de *TRPM4* también promueve la angiogénesis después del accidente cerebrovascular isquémico. Algunos

de los efectos beneficiosos de la glibenclámid puede reflejar una actividad reducida de  $K_{ATP}$  microglial.<sup>64</sup>

**IMPLICANCIAS TERAPÉUTICAS.** La evidencia preclínica discutida anteriormente apoya firmemente que la hiperactividad de SUR1-TRPM4 es un potencial blanco terapéutico para la protección neurovascular y la reducción del edema cerebral en trastornos neurológicos en humanos. Un estudio reciente fase 2 aleatorizado, doble ciego, controlado con placebo con gliburida (glibenclámid) IV en pacientes con grandes infartos cerebrales de circulación anterior de menos de 10 horas y una RM con DWI basal con un volumen de lesión de 82-300 mm<sup>3</sup> y, por lo tanto, con un gran riesgo de edema cerebral<sup>4</sup> mostró que la gliburida IV fue bien tolerada y redujo la inflamación cerebral, consistente con la participación de la vía SUR1-TRMP4 en el edema cerebral. Sin embargo, no hubo diferencias en la necesidad de craniectomía descompresiva o el *outcome* clínico primario compuesto.<sup>4</sup> Esto sugiere que SUR1 participa en mecanismos complejos que podrían influir en la evolución de la lesión en el SNC en humanos, aunque su utilidad aún no está probada.

Además de los efectos de los canales SUR1-TRPM4 sobrerregulados en respuesta a la reducción de ATP, el cotransportador constitutivo endotelial Na<sup>+</sup>-K<sup>+</sup>-2Cl (NKCC1) activado por ATP contribuye al desarrollo del edema cerebral. Esta dependencia opuesta de los niveles intracelulares de ATP indica que tanto SUR1-TRPM4 o NKCC1 podía ser el principal responsable del edema cerebral en respuesta a los niveles fluctuantes de ATP como ocurre en períodos de isquemia y reperfusión. Así, según el tiempo después del accidente cerebrovascular y el estado energético del tejido, la prevención óptima del edema requeriría un antagonista de SUR1 tal como glibenclámid, un bloqueador NKCC1 tal como bumetanida, o ambos.<sup>72</sup> Además, los posibles beneficios del bloqueo de SUR1 por glibenclámid u otras sulfonilureas deben ser balanceados contra los posibles riesgos del bloqueo del potencial efecto neuroprotector de los canales en situaciones de falla energética.<sup>53,55</sup> Por ejemplo en ratones con diabetes inducida por estreptozotocina el bloqueo de  $K_{ATP}$  mediado por tolbutamida aumentó la lesión neuronal inducida por privación de oxígeno-glucosa *in vitro* y oclusión de la arteria cerebral media permanente *in vivo*.<sup>73</sup>

**PERSPECTIVA** Los receptores de la sulfonilurea, que funcionan como subunidades reguladoras de los canales  $K_{ATP}$  y TRPM4, proporcionan un sustrato fisiopatológico para la canalopatías genéticas que afectan la secreción de insulina, la función cardíaca, el tono vasomotor y la excitabilidad neuronal. Estos receptores también proporcionan

un sustrato tanto para la neuroprotección, como para la lesión, en el contexto de trastornos neurológicos agudos. Las sulfonilureas, bloqueando los canales SUR1 acoplados a Kir6.2 ( $K_{ATP}$ ) y TRMP4, pueden por ende tener un impacto profundo en estas condiciones; su efecto puede depender del momento de la administración y el estado fisiopatológico subyacente. Además, los potenciales efectos de la inhibición de SUR1 sobre la función de los canales  $K_{ATP}$  o TRMP4 en el corazón y los vasos sanguíneos cerebrales en condiciones patológicas también deben considerarse en situaciones de reserva de energía limitada en el sistema nervioso.

#### FINANCIAMIENTO DEL ESTUDIO

No se informó de financiación específica.

#### CONFLICTO DE INTERESES

E. Benarroch recibe un estipendio en su calidad de editor de sección de Implicancias Clínicas de la Investigación en Neurociencia para Neurology®. Ir a Neurology.org para declaraciones completas.

#### BIBLIOGRAFÍA

1. Nichols CG. KATP channels as molecular sensors of cellular metabolism. *Nature* 2006;440:470-476.
2. Woo SK, Kwon MS, Ivanov A, Gerzanich V, Simard JM. The sulfonilurea receptor 1 (Sur1)-transient receptor potential melastatin 4 (Trpm4) channel. *J Biol Chem* 2013;288:3655-3667.
3. Simard JM, Sheth KN, Kimberly WT, et al. Glibenclamide in cerebral ischemia and stroke. *Neurocrit Care* 2014;20:319-333.
4. Sheth KN, Elm JJ, Molyneux BJ, et al. Safety and efficacy of intravenous glyburide on brain swelling after large hemispheric infarction (GAMES-RP): a randomised, doubleblind, placebo-controlled phase 2 trial. *Lancet Neurol* 2016;15:1160-1169.
5. Krueger M, Hartig W, Frydrychowicz C, et al. Stroke-induced blood-brain barrier breakdown along the vascular tree: no preferential affection of arteries in different animal models and in humans. *J Cereb Blood Flow Metab Epub* 2016 Sep 28.
6. Stokum JA, Gerzanich V, Simard JM. Molecular pathophysiology of cerebral edema. *J Cereb Blood Flow Metab* 2016;36:513-538.
7. del Zoppo GJ. Inflammation and the neurovascular unit in the setting of focal cerebral ischemia. *Neuroscience* 2009;158:972-982.
8. Terasaki Y, Liu Y, Hayakawa K, et al. Mechanisms of neurovascular dysfunction in acute ischemic brain. *Curr Med Chem* 2014;21:2035-2042.
9. Shi NQ, Ye B, Makielski JC. Function and distribution of the SUR isoforms and splice variants. *J Mol Cell Cardiol* 2005;39:51-60.
10. Locher KP. Review. Structure and mechanism of ATPbinding cassette transporters. *Philos Trans R Soc Lond B Biol Sci* 2009;364:239-245.
11. Hernandez-Sanchez C, Ito Y, Ferrer J, Reitman M, LeRoith D. Characterization of the mouse sulfonilurea receptor 1 promoter and its regulation. *J Biol Chem* 1999;274:18261-18270.
12. Ashfield R, Ashcroft SJ. Cloning of the promoters for the beta-cell ATP-sensitive K-channel subunits Kir6.2 and SUR1. *Diabetes* 1998;47:1274-1280.
13. Simard JM, Woo SK, Schwartzbauer GT, Gerzanich V. Sulfonilurea receptor 1 in central nervous system injury: a focused review. *J Cereb Blood Flow Metab* 2012;32:1699-1717.

14. Inagaki N, Gonoi T, Clement JP, et al. A family of sulfonilurea receptors determines the pharmacological properties of ATP-sensitive K1 channels. *Neuron* 1996;16:1011–1017.
15. Ardehali H, O'Rourke B. Mitochondrial K(ATP) channels in cell survival and death. *J Mol Cell Cardiol* 2005;39:7–16.
16. Aittoniemi J, Fotinou C, Craig TJ, de Wet H, Proks P, Ashcroft FM. Review. SUR1: a unique ATP-binding cassette protein that functions as an ion channel regulator. *Philos Trans R Soc Lond B Biol Sci* 2009;364:257–267.
17. Soundarapandian MM, Wu D, Zhong X, et al. Expression of functional Kir6.1 channels regulates glutamate release at CA3 synapses in generation of epileptic form of seizures. *J Neurochem* 2007;103:1982–1988.
18. Kawamura M Jr, Ruskin DN, Masino SA. Metabolic autocrine regulation of neurons involves cooperation among pannexin hemichannels, adenosine receptors, and KATP channels. *J Neurosci* 2010;30:3886–3895.
19. Zhao K, Wen R, Wang X, et al. EPAC inhibition of SUR1 receptor increases glutamate release and seizure vulnerability. *J Neurosci* 2013;33:8861–8865.
20. Ashcroft FM. ATP-sensitive potassium channelopathies: focus on insulin secretion. *J Clin Invest* 2005;115:2047–2058.
21. Miki T, Liss B, Minami K, et al. ATP-sensitive K1 channels in the hypothalamus are essential for the maintenance of glucose homeostasis. *Nat Neurosci* 2001;4:507–512.
22. Olson TM, Terzic A. Human K(ATP) channelopathies: diseases of metabolic homeostasis. *Pflugers Arch* 2010;460:295–306.
23. Stoller DA, Fahrenbach JP, Chalupsky K, et al. Cardiomyocyte sulfonylurea receptor 2-KATP channel mediates cardioprotection and ST segment elevation. *Am J Physiol Heart Circ Physiol* 2010;299:H1100–H1108.
24. Ploug KB, Baun M, Hay-Schmidt A, Olesen J, Jansen-Olesen I. Presence and vascular pharmacology of KATP channel subtypes in rat central and peripheral tissues. *Eur J Pharmacol* 2010;637:109–117.
25. Yamaguchi S, Tanimoto A, Otsuguro K, Hibino H, Ito S. Negatively charged amino acids near and in transient receptor potential (TRP) domain of TRPM4 channel are one determinant of its Ca21 sensitivity. *J Biol Chem* 2014;289:35265–35282.
26. Bousova K, Jirku M, Bumba L, et al. PIP2 and PIP3 interact with N-terminus region of TRPM4 channel. *Biophys Chem* 2015;205:24–32.
27. Cho CH, Lee YS, Kim E, Hwang EM, Park JY. Physiological functions of the TRPM4 channels via protein interactions. *BMB Rep* 2015;48:1–5.
28. Guinamard R, Demion M, Launay P. Physiological roles of the TRPM4 channel extracted from background currents. *Physiology* 2010;25:155–164.
29. Menigoz A, Ahmed T, Sabanov V, et al. TRPM4-dependent post-synaptic depolarization is essential for the induction of NMDA receptor-dependent LTP in CA1 hippocampal neurons. *Pflugers Arch* 2016;468:593–607.
30. Funk GD. I think I(CAN): modulation of TRPM4 channels may contribute not only to the emergence of rhythm, but robust output and metabolic sensitivity of the pre-Bötzing complex inspiratory network. *J Physiol* 2013;591:1593–1594.
31. Brayden JE, Earley S, Nelson MT, Reading S. Transient receptor potential (TRP) channels, vascular tone and autoregulation of cerebral blood flow. *Clin Exp Pharmacol Physiol* 2008;35:1116–1120.
32. Earley S. TRPM4 channels in smooth muscle function. *Pflugers Arch* 2013;465:1223–1231.
33. Stallmeyer B, Zumhagen S, Denjoy I, et al. Mutational spectrum in the Ca(21)-activated cation channel gene TRPM4 in patients with cardiac conduction disturbances. *Hum Mutat* 2012;33:109–117.
34. Hof T, Simard C, Rouet R, Salle L, Guinamard R. Implication of the TRPM4 nonselective cation channel in mammalian sinus rhythm. *Heart Rhythm* 2013;10:1683–1689.
35. Kruse M, Pongs O. TRPM4 channels in the cardiovascular system. *Curr Opin Pharmacol* 2014;15:68–73.
36. Guinamard R, Bouvagnet P, Hof T, Liu H, Simard C, Salle L. TRPM4 in cardiac electrical activity. *Cardiovasc Res* 2015;108:21–30.
37. Kurland DB, Gerzanich V, Karimy JK, et al. The Sur1-Trpm4 channel regulates NOS2 transcription in TLR4-activated microglia. *J Neuroinflammation* 2016;13:130.
38. Takezawa R, Cheng H, Beck A, et al. A pyrazole derivative potently inhibits lymphocyte Ca21 influx and cytokine production by facilitating transient receptor potential melastatin 4 channel activity. *Mol Pharmacol* 2006;69:1413–1420.
39. Sala-Rabanal M, Wang S, Nichols CG. On potential interactions between non-selective cation channel TRPM4 and sulfonylurea receptor SUR1. *J Biol Chem* 2012;287:8746–8756.
40. Koster JC, Kurata HT, Enkvetchakul D, Nichols CG. DEND mutation in Kir6.2 (KCNJ11) reveals a flexible N-terminal region critical for ATP-sensing of the KATP channel. *Biophys J* 2008;95:4689–4697.
41. Aggarwal NT, Shi NQ, Makielski JC. ATP-sensitive potassium currents from channels formed by Kir6 and a modified cardiac mitochondrial SUR2 variant. *Channels* 2013;7:493–502.
42. Fendler W, Pietrzak I, Brereton MF, et al. Switching to sulphonylureas in children with iDEND syndrome caused by KCNJ11 mutations results in improved cerebellar perfusion. *Diabetes Care* 2013;36:2311–2316.
43. Maejima Y, Hasegawa S, Horita S, et al. Water intake disorder in a DEND syndrome afflicted patient with R50P mutation. *Endocr J* 2015;62:387–392.
44. Koster JC, Cadario F, Peruzzi C, Colombo C, Nichols CG, Barbetti F. The G53D mutation in Kir6.2 (KCNJ11) is associated with neonatal diabetes and motor dysfunction in adulthood that is improved with sulfonylurea therapy. *J Clin Endocrinol Metab* 2008;93:1054–1061.
45. Babenko AP, Polak M, Cave H, et al. Activating mutations in the ABCC8 gene in neonatal diabetes mellitus. *N Engl J Med* 2006;355:456–466.
46. Harakalova M, van Harssel JJ, Terhal PA, et al. Dominant missense mutations in ABCC9 cause Cantu syndrome. *Nat Genet* 2012;44:793–796.
47. van Bon BW, Gilissen C, Grange DK, et al. Cantu syndrome is caused by mutations in ABCC9. *Am J Hum Genet* 2012;90:1094–1101.
48. Brownstein CA, Towne MC, Luquette LJ, et al. Mutation of KCNJ8 in a patient with Cantu syndrome with unique vascular abnormalities: support for the role of K(ATP) channels in this condition. *Eur J Med Genet* 2013;56:678–682.
49. Cooper PE, Reutter H, Woelfle J, et al. Cantu syndrome resulting from activating mutation in the KCNJ8 gene. *Hum Mutat* 2014;35:809–813.
50. Cooper PE, Sala-Rabanal M, Lee SJ, Nichols CG. Differential mechanisms of Cantu syndrome-associated gain of function mutations in the ABCC9 (SUR2) subunit of the KATP channel. *J Gen Physiol* 2015;146:527–540.
51. Nichols CG, Singh GK, Grange DK. KATP channels and cardiovascular disease: suddenly a syndrome. *Circ Res* 2013;112:1059–1072.

52. Leon Guerrero CR, Pathak S, Grange DK, et al. Neurologic and neuroimaging manifestations of Cantu syndrome: a case series. *Neurology* 2016;87:270–276.
53. Yamada K, Inagaki N. Neuroprotection by KATP channels. *J Mol Cell Cardiol* 2005;38:945–949.
54. Dong YF, Wang LX, Huang X, et al. Kir6.1 knock-down aggravates cerebral ischemia/reperfusion-induced neural injury in mice. *CNS Neurosci Ther* 2013;19:617–624.
55. Sun HS, Feng ZP. Neuroprotective role of ATP-sensitive potassium channels in cerebral ischemia. *Acta Pharmacol Sin* 2013;34:24–32.
56. Zhang Y, Pan S, Zheng X, Wan Q. Cytomembrane ATP-sensitive K1 channels in neurovascular unit targets of ischemic stroke in the recovery period. *Exp Ther Med* 2016;12:1055–1059.
57. Gupta S, Singh P, Sharma B. Neuroprotective effects of nicorandil in chronic cerebral hypoperfusion-induced vascular dementia. *J Stroke Cerebrovasc Dis Epub* 2016 Sep 9.
58. Ji J, Yan H, Chen ZZ, et al. Iptakalim protects against ischemic injury by improving neurovascular unit function in the mouse brain. *Clin Exp Pharmacol Physiol* 2015;42:766–771.
59. Gimenez-Cassina A, Martinez-Francois JR, Fisher JK, et al. BAD-dependent regulation of fuel metabolism and K(ATP) channel activity confers resistance to epileptic seizures. *Neuron* 2012;74:719–730.
60. Tanner GR, Lutas A, Martinez-Francois JR, Yellen G. Single K ATP channel opening in response to action potential firing in mouse dentate granule neurons. *J Neurosci* 2011;31:8689–8696.
61. Sheikhi M, Shirzadian A, Dehdashtian A, et al. Involvement of ATP-sensitive potassium channels and the opioid system in the anticonvulsive effect of zolpidem in mice. *Epilepsy Behav* 2016;62:291–296.
62. Shafaroodi H, Barati S, Ghasemi M, Almasirad A, Moezi L. A role for ATP-sensitive potassium channels in the anticonvulsant effects of triamterene in mice. *Epilepsy Res* 2016;121:8–13.
63. Nistico R, Piccirilli S, Sebastianelli L, Nistico G, Bernardi G, Mercuri NB. The blockade of K(1)-ATP channels has neuroprotective effects in an in vitro model of brain ischemia. *Int Rev Neurobiol* 2007;82:383–395.
64. Ortega FJ, Vukovic J, Rodriguez MJ, Bartlett PF. Blockade of microglial KATP-channel abrogates suppression of inflammatory-mediated inhibition of neural precursor cells. *Glia* 2014;62:247–258.
65. Mehta RI, Ivanova S, Tosun C, Castellani RJ, Gerzanich V, Simard JM. Sulfonylurea receptor 1 expression in human cerebral infarcts. *J Neuropathol Exp Neurol* 2013;72: 871–883.
66. Martinez-Valverde T, Vidal-Jorge M, Martinez-Saez E, et al. Sulfonylurea receptor 1 in humans with posttraumatic brain contusions. *J Neurotrauma* 2015;32:1478–1487.
67. Caffes N, Kurland DB, Gerzanich V, Simard JM. Glibenclamide for the treatment of ischemic and hemorrhagic stroke. *Int J Mol Sci* 2015;16:4973–4984.
68. Makar TK, Gerzanich V, Nimmagadda VK, et al. Silencing of Abcc8 or inhibition of newly upregulated Sur1-Trpm4 reduce inflammation and disease progression in experimental autoimmune encephalomyelitis. *J Neuroinflammation* 2015;12:210.
69. Wu Z, Zhu SZ, Hu YF, et al. Glibenclamide enhances the effects of delayed hypothermia after experimental stroke in rats. *Brain Res* 2016;1643:113–122.
70. Huang K, Wang Z, Gu Y, et al. Glibenclamide is comparable to target temperature management in improving survival and neurological outcome after asphyxial cardiac arrest in rats. *J Am Heart Assoc* 2016;5:e003465.
71. Loh KP, Ng G, Yu CY, et al. TRPM4 inhibition promotes angiogenesis after ischemic stroke. *Pflugers Arch* 2014;466:563–576.
72. Simard JM, Kahle KT, Gerzanich V. Molecular mechanisms of microvascular failure in central nervous system injury—synergistic roles of NKCC1 and SUR1/TRPM4. *J Neurosurg* 2010;113:622–629.
73. Liu R, Wang H, Xu B, et al. Cerebrovascular safety of sulfonylureas: the role of KATP channels in neuroprotection and the risk of stroke in patients with type 2 diabetes. *Diabetes* 2016;65:2795–2809.
